# Supplementary material for: Preschoolers rely on rich speech representations to process variable speech
Source: PubMed Central journal article supplement (PMC10330571; doi:10.1111/cdev.13922), 2023-04-10
Supplement: NIHMS1907732-supplement-I.pdf [file NIHMS1907732-supplement-I.pdf]

Supplementary Materials I for “Preschoolers rely on rich speech representations  
to process variable speech”

### Photo norming

In a pretest conducted in their preschool classroom, N=30 children, all typically-developing per teacher report, correctly identified the familiar items. Children were presented with 4 different items and were asked to name each one and point to the photo of the target familiar item (e.g. *soup*). All of the familiar items were correctly or appropriately labeled (i.e., “food” instead of *soup*) by at least 80% of the children. As in Law and Edwards (2015), N=14 of these children additionally completed an open-set test to identify the unfamiliar items.

### Demographic information

Table 1

*Demographic information of children who completed standardized speech-language measures, by hearing status (N=33 children with CIs and N=24 with TH). Mean (SD), range.*

| Group             | Girls, Boys | Chronological Age:<br>months | Hearing Age:<br>months | Maternal<br>Education Level |
|-------------------|-------------|------------------------------|------------------------|-----------------------------|
| Children with CIs | 21, 12      | 50.91 (10.01) 34–66          | 33.33 (14.91) 5–56     | 5.76 (1.09)                 |
| Children with TH  | 15, 9       | 52.71 (10.81) 36–66          | 52.71 (10.81) 36–66    | 5.67 (1.34)                 |

| <b>Parametric coefficients</b>                                       | <b>Estimate</b> | <b>Std. Error</b> | <b>t-value</b> | <b>p-value</b> |
|----------------------------------------------------------------------|-----------------|-------------------|----------------|----------------|
| Intercept (Cochlear Implant: Mispronunciation)                       | 0.28            | 0.19              | 1.44           | 0.15           |
| Typical Hearing                                                      | -0.37           | 0.20              | -1.82          | 0.07           |
| <b>Smooth terms</b>                                                  | <b>edf</b>      | <b>Ref. df</b>    | <b>F-value</b> | <b>p-value</b> |
| s(Time)                                                              | 0.00            | 0.00              | 6.26           | < 0.001        |
| s(Time,Cochlear Implant)                                             | 1.00            | 1.00              | 0.14           | 0.71           |
| s(Time,Typical Hearing)                                              | 3.86            | 4.84              | 3.02           | 0.01           |
| s(Time,Cochlear Implant Correct - Cochlear Implant Mispronunciation) | 5.68            | 6.71              | 6.71           | < 0.001        |
| s(Time,Typical Hearing Difference - Cochlear Implant Difference)     | 5.86            | 7.05              | 2.19           | 0.04           |
| s(Time,Child)                                                        | 66.37           | 341.00            | 0.42           | < 0.001        |
| s(Time,Item)                                                         | 34.61           | 107.00            | 0.72           | < 0.001        |
| s(Time,Observation)                                                  | 0.00            | 27.00             | 0.01           | < 0.001        |

Table 2

*Predicting the degree of mispronunciation sensitivity by hearing status.*

| <b>Parametric coefficients</b>      | <b>Estimate</b> | <b>Std. Error</b> | <b>t-value</b> | <b>p-value</b> |
|-------------------------------------|-----------------|-------------------|----------------|----------------|
| Intercept (Mispronunciation)        | 0.08            | 0.17              | 0.47           | 0.64           |
| Correct                             | 0.74            | 0.19              | 3.87           | 0.001          |
| <b>Smooth terms</b>                 | <b>edf</b>      | <b>Ref. df</b>    | <b>F-value</b> | <b>p-value</b> |
| s(Time)                             | 0.00            | 9.00              | 0.00           | 0.50           |
| s(Time,Correct)                     | 3.23            | 9.00              | 2.45           | < 0.001        |
| s(Age)                              | 0.58            | 9.00              | 0.15           | 0.01           |
| te(Time,Age; Correct)               | 3.27            | 24.00             | 0.42           | 0.003          |
| te(Time,Phonetic Accuracy; Correct) | 3.18            | 24.00             | 0.45           | 0.001          |
| s(Time,Child)                       | 48.16           | 296.00            | 0.28           | < 0.001        |
| s(Time,Item)                        | 10.78           | 106.00            | 0.24           | < 0.001        |
| s(Time,Observation)                 | 0.49            | 26.00             | 0.03           | 0.02           |
| s(Time,Child; Correct)              | 0.00            | 296.00            | 0.00           | < 0.001        |

Table 3

*Predicting the degree of mispronunciation sensitivity by phonetic accuracy score.*

## References

- Law, F., & Edwards, J. R. (2015). Effects of Vocabulary Size on Online Lexical Processing by Preschoolers. *Language Learning and Development*, *11*(4), 331–355. doi: 10.1080/15475441.2014.961066
